# Supplementary material
Source: PubMed Central journal article supplement (PMC2748248)
Supplement: NIHMS125352-supplement-supplement.pdf [file NIHMS125352-supplement-supplement.pdf]

# Supplementary Figure S1

**A**

## Pin1 staining

|              | Low (L)           | High (H)          | Total            |
|--------------|-------------------|-------------------|------------------|
| *Cyclin D1   | L 48 (41.7%)      | 33 (28.7%)        | 81 (70.4%)       |
|              | H 13 (11.3%)      | 21 (18.3%)        | 34 (29.6%)       |
| <b>Total</b> | <b>61 (53.0%)</b> | <b>54 (47.0%)</b> | <b>115(100%)</b> |

\* r=0.192, p< 0.05

**B**

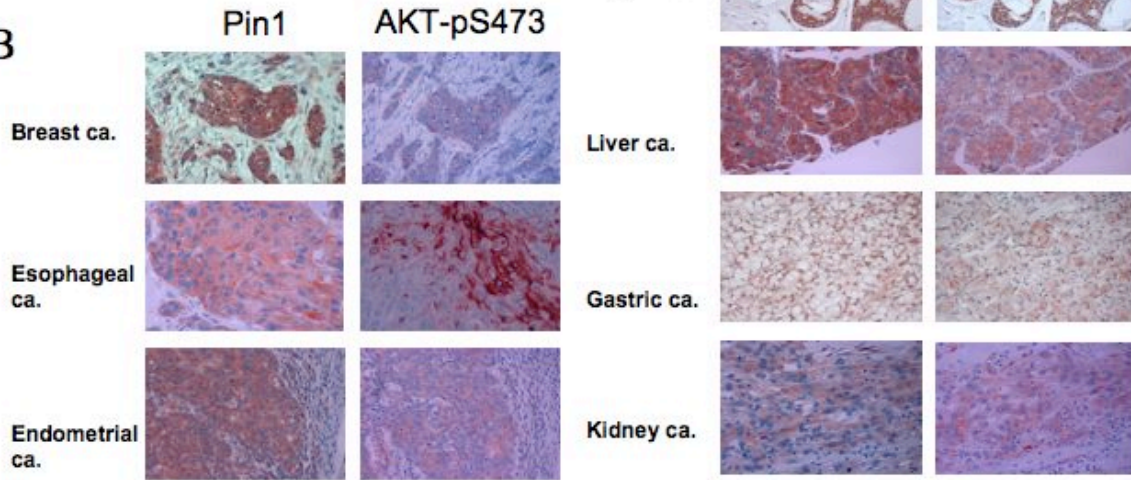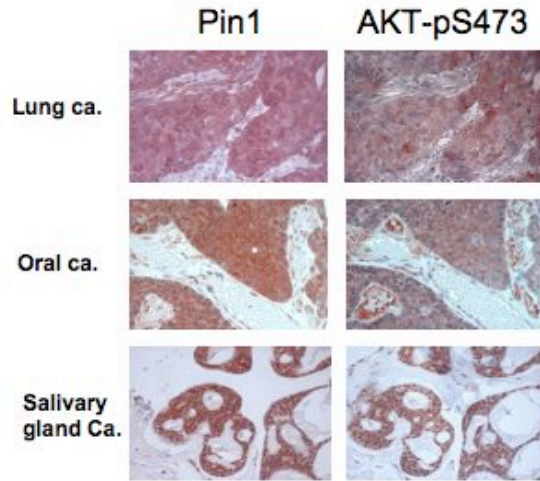

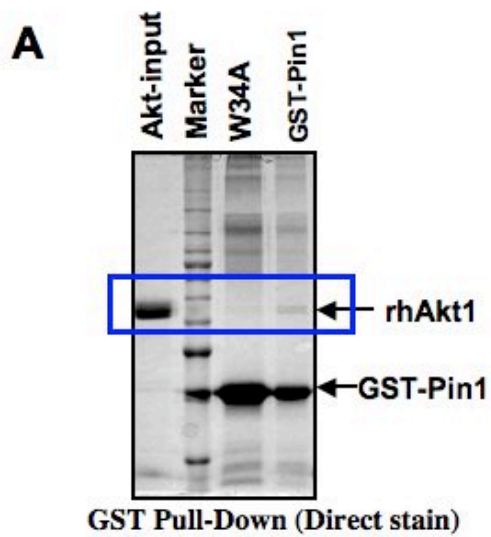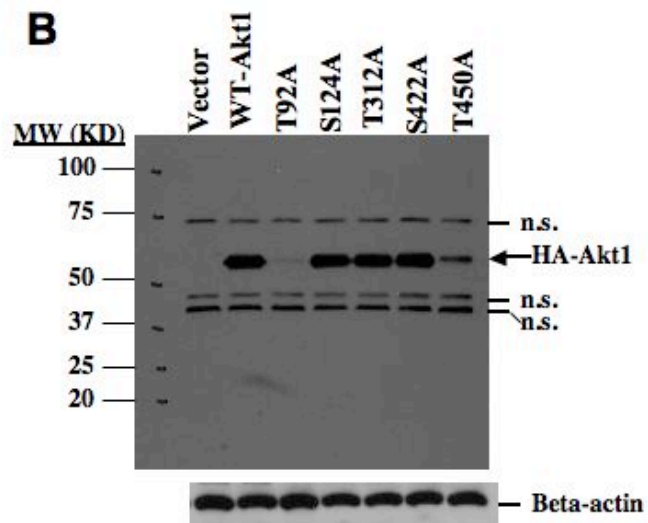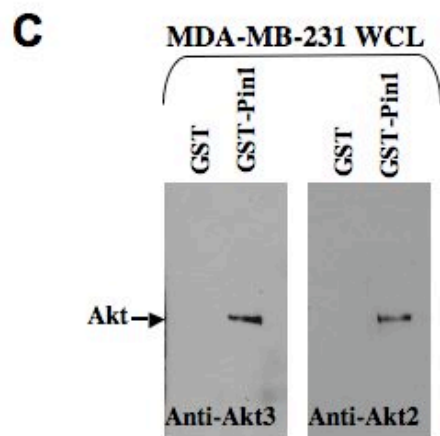

Supplementary Figure S2

**Supplementary Figure S3**

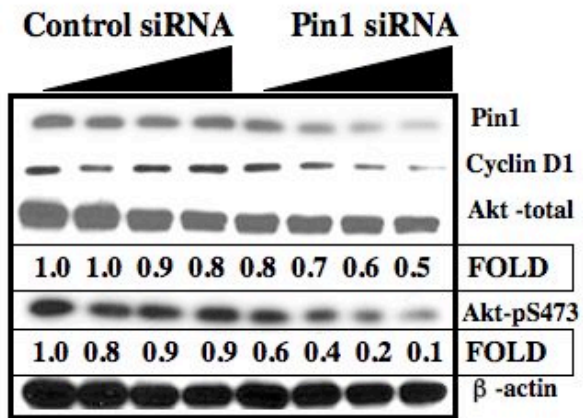

**Supplementary Table 1. Ser/Thr-Pro sites on human Akt1 protein**

| Ligand                              | Position |    |    |      |    |    |    |    |
|-------------------------------------|----------|----|----|------|----|----|----|----|
|                                     | -3       | -2 | -1 | 0    | +1 | +2 | +3 |    |
| <i>Pin1 PPIase substrate</i>        |          | A  | A  | pS/T | P  | F  | NH | Np |
| <i>Pin1 consensus binding sites</i> | W        | F  | Y  | pS/T | P  | R  | L  | X  |
|                                     | Y        | I  | R  |      |    | F  | I  |    |
|                                     | F        |    | F  |      |    | W  |    |    |
| <i>MPM2 consensus binding sites</i> | Y        | W  | F  | pS/T | P  | L  | X  | X  |
|                                     | F        | F  | L  |      |    | I  |    |    |
| <i>S/T P sites on Akt1</i>          |          |    |    |      |    |    |    |    |
| T92 P                               | H        | V  | E  | pT   | P  | E  | E  | R  |
| S124 P                              | R        | S  | G  | pS   | P  | S  | D  | N  |
| T312 P                              | F        | C  | G  | pT   | P  | E  | Y  | W  |
| S422 P                              | K        | K  | L  | pS   | P  | P  | F  | K  |
| T450 P                              | I        | T  | I  | pT   | P  | P  | D  | Q  |

**Supplementary Table 2*****T92 and T450-Pro (Akt1) motifs are conserved evolutionarily***

|                            | <b>T92-Pro</b>        | <b>T450-Pro</b>       |
|----------------------------|-----------------------|-----------------------|
| sp P31749  KRAC_HUMAN      | HVE- <b>T</b> -PEEREE | QMITI- <b>T</b> -PPDQ |
| tr Q9BWB6  Akt1-Mouse      | HVE- <b>T</b> -PEEREE | QMITI- <b>T</b> -PPDQ |
| sp P47196  KRAC_RAT        | HVE- <b>T</b> -PEEREE | QMITI- <b>T</b> -PPDQ |
| tr O57513  Akt1-Gallus     | HVE- <b>T</b> -PEEREE | QMITI- <b>T</b> -PPDQ |
| tr Q98TY9  Akt1-Xenopus    | HVD- <b>S</b> -PEEREE | QMITI- <b>T</b> -PPDQ |
| sp Q60823 AKT2_MOUSE       | HVD- <b>S</b> -PDEREE | QSITI- <b>T</b> -PPDR |
| sp P31751  AKT2_HUMAN      | HVD- <b>S</b> -PDEREE | QSITI- <b>T</b> -PPDR |
| tr Q7ZX15  Akt2-Xenopus    | HVD- <b>T</b> -PEEREE | QSITL- <b>T</b> -PPDR |
| sp P47197  AKT2_RAT        | HVD- <b>S</b> -PDEREE | QSITI- <b>T</b> -PPDR |
| sp Q9Y243  AKT3_HUMAN      | HVD- <b>T</b> -PEEREE | QTITI- <b>T</b> -PPEK |
| sp Q9WUA6  AKT3_MOUSE      | HVD- <b>T</b> -PEEREE | QTITI- <b>T</b> -PPEK |
| tr Q8UUX0  Akt2-Zebrafish  | HVD- <b>S</b> -NSEREE | QTITV- <b>T</b> -PPDQ |
| sp Q63484 AKT3_RAT         | HVD- <b>T</b> -PEEREE | QTITI- <b>T</b> -PPEK |
| tr Q24293  AKT1-DROSOPHIA  | AVE- <b>S</b> -ELERHE | ESVEL- <b>T</b> -PPDP |
| tr Q17942  AKT1-C. elegans | YAE- <b>S</b> -AEVRQR | QPVQL- <b>T</b> -PPSR |
